# Supplementary material
Source: PubMed Central journal article supplement (PMC2906566)
Supplement: 0914191107_pnas.200914191SI.pdf [file 0914191107_pnas.200914191SI.pdf]

# Supporting Information

Burgess et al. 10.1073/pnas.0914191107

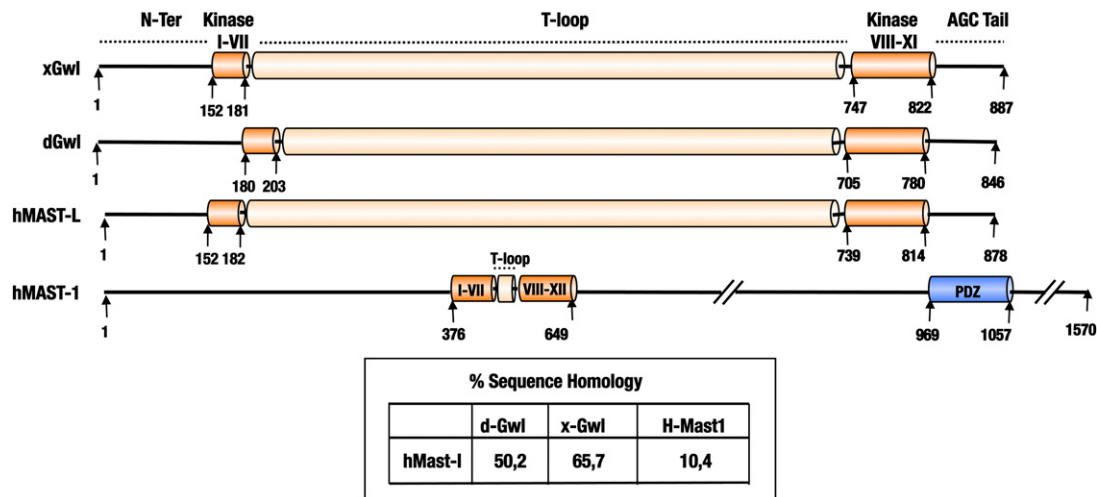

**Fig. S1.** Sequence homology among *Xenopus* Greatwall (xGwl), *Drosophila* Gwl (dGwl), human microtubule-associated serine/threonine kinase-like (hMAST-L), and human MAST1 (hMAST1). Shown are the kinase domains of all four proteins. xGwl, dGwl, and hMAST-L have a kinase domain separated by a very long T-loop (> 500 amino acids), whereas the MAST1 protein contains a conventional T-Loop of about 30 amino acids. Neither xGwl, dGwl, nor hMAST-L contains a PDZ domain, a characteristic motif of the MAST family of proteins. Finally, hMAST-L has a much higher sequence homology with dGwl and xGwl compared with the hMAST1 protein.

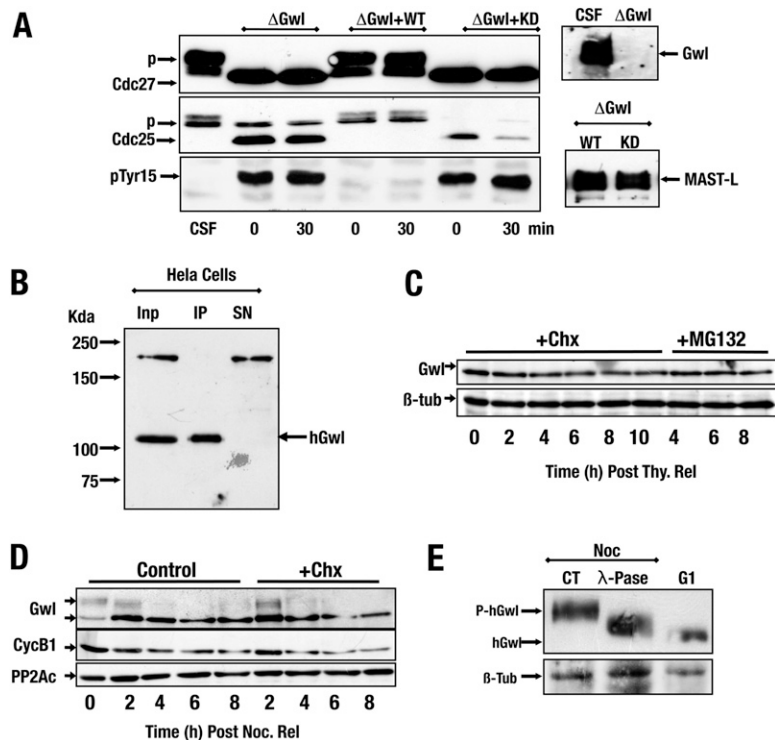

**Fig. S2.** hGwl protein levels remain constant throughout the cell cycle. (A) WT or kinase dead (KD) MAST-L mRNAs were translated or not ( $\Delta$ Gwl) in CSF (M-phase frog egg) extracts that were then depleted of endogenous Gwl ( $\Delta$ Gwl) using *Xenopus* anti-Gwl antibodies. The levels of endogenous Gwl before (CSF) and after depletion ( $\Delta$ Gwl), as well as the WT and KD MAST-L levels in translated CSF extracts after depletion of *Xenopus* Gwl are shown. The ability of hGwl to rescue the mitotic exit was assessed by analyzing the phosphorylation of Cdc27, Cdc25, and pTyr15 on Cdc2. (B) Asynchronously growing HeLa cells were lysed and used for immunoprecipitation with anti-hGwl antibodies. (C) HeLa cells, synchronized in G1/S by thymidine, were treated with (Chx) or without 100  $\mu$ g/mL of cycloheximide or MG132 (12.5  $\mu$ M) for the indicated times. (D) Mitotic HeLa cells, synchronized by nocodazole shake-off, were treated with 100  $\mu$ g/mL cycloheximide (Chx) for the indicated time. (E) Nocodazole-arrested HeLa cell lysates were treated with ( $\lambda$ -Pase) or not (CT) with lambda phosphatase and the electrophoretic mobility of hGwl in these two samples was compared.



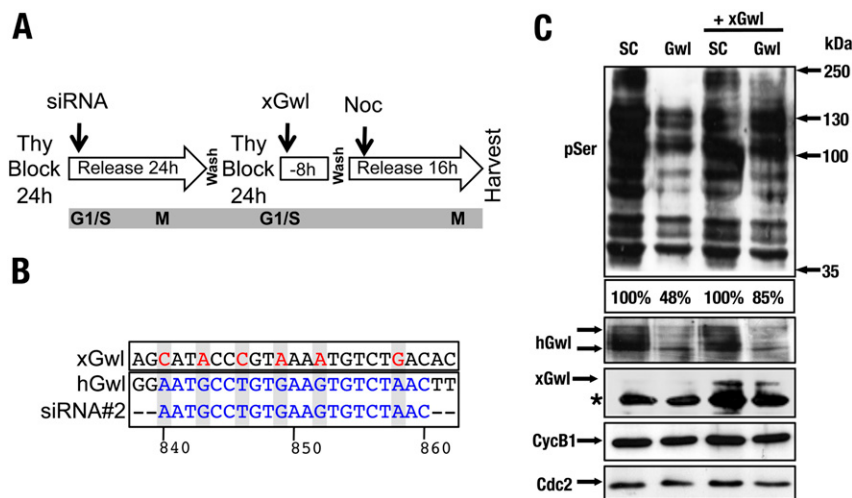

**Fig. S6.** Decrease of cyclin B-Cdc2 substrate phosphorylation in Gwl knockdown cells is rescued by the cotransfection of a siRNA-resistant plasmid encoding *Xenopus* Gwl. (A) HeLa cells were synchronized in G1/S by thymidine and transfected with a dose of 50 nM siRNA (sequence #2) for 24 h. The siRNA was removed and cells were then blocked again for 24 h with thymidine. Eight hours before release, cells were transfected with a resistant plasmid coding for *Xenopus* Gwl. (B) Picture showing the siRNA #2 used in this experiment targeting sequence from 840 to 860 of hGwl. The corresponding sequence of *Xenopus* Gwl is detailed. Cells were washed three times with media and released into fresh media supplemented with nocodazole (100 ng/mL) for 16 h to capture mitotic cells. (C) Phosphorylation of cyclin B-Cdc2 substrates as well as human Gwl, *Xenopus* Gwl, cyclin B1, and Cdc2 levels were analyzed by Western blot. The pSer staining was equalized against Cdc2 and the percentage of staining in each condition was indicated. \* Denotes a nonspecific band.

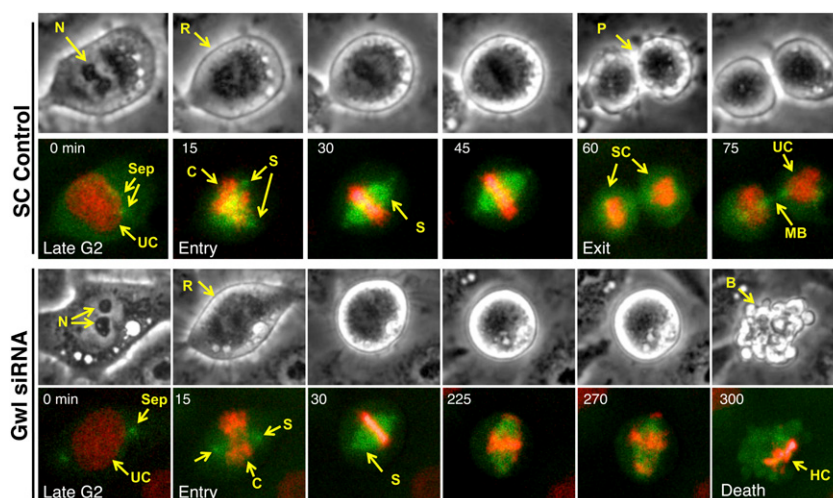

**Fig. S7.** Late G2 phase cells were identified by the presence of uncondensed chromosomes (UC), partial centrosome separation (Sep), and the presence of nucleoli. In all cases, mitotic entry was determined by the following visual cues, loss of nucleoli (N) and rounding up (R) of the cell from the culture dish in phase/contrast, cross referenced with the presence of condensed chromosomes (C) and a mitotic spindle in the fluorescence channel (S). Exit was scored based on when cells attempted to perform anaphase: the separation (SC) or loss of condensation of chromosomes (UC) and presence of a midbody (MB) in the fluorescence channel or pinching of the membrane (P) under phase/contrast. Cell death was scored by the first appearance of severe membrane blebbing (B), cross-referenced with hyper condensed chromatin (HC).

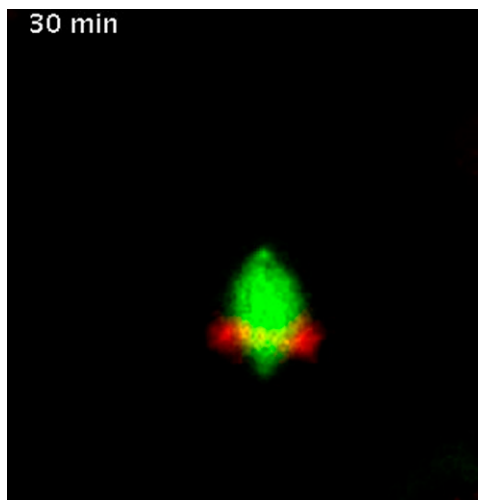

**Movie S1.** Scramble siRNA-Control. HeLa cells stably expressing H2B-Cherry FP (red) and EB3-GFP (green) were transfected with 50 nM of siRNA (Scramble), then synchronized using thymidine. Movies were started 5 h after release and frames were taken every 15 min.

[Movie S1](#)

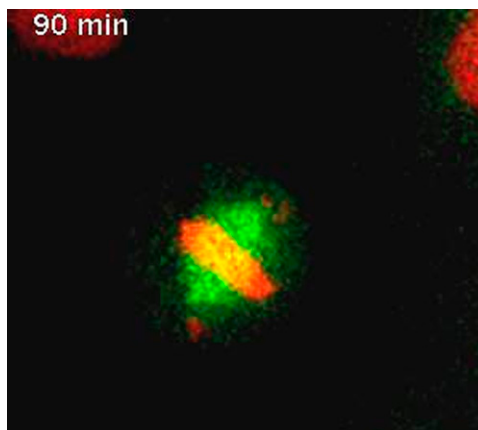

**Movie S2.** Greatwall siRNA-Segregation Defect. HeLa cells stably expressing H2B-Cherry FP (red) and EB3-GFP (green) were transfected with 50 nM of hGwl siRNA, then synchronized using thymidine. Movies were started 5 h after release and frames were taken every 15 min. Movie shows a typical cell that displayed chromosome segregation defects and subsequent formation of a multinuclear cell.

[Movie S2](#)

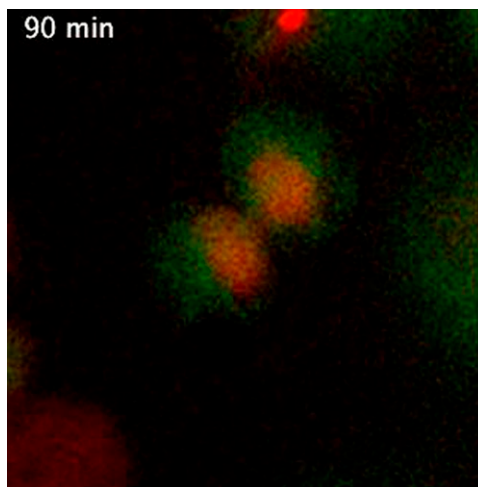

**Movie S3.** Greatwall siRNA-Mitotic Arrest. HeLa cells stably expressing H2B-Cherry FP (red) and EB3-GFP (green) were transfected with 50 nM of hGwl siRNA, then synchronized using thymidine. Movies were started 5 h after release and frames were taken every 15 min. Movie shows a typical cell that arrested during mitosis, underwent spindle rotation, and failed to properly congress all chromosomes to the metaphase plate, finally undergoing cell death after ~8 h.

[Movie S3](#)

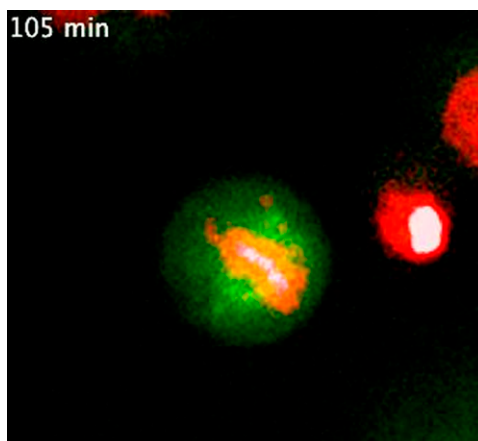

**Movie S4.** Greatwall siRNA-Mitotic Delay. HeLa cells stably expressing H2B-Cherry FP (red) and EB3-GFP (green) were transfected with 50 nM of hGwl siRNA, then synchronized using thymidine. Movies were started 5 h after release and frames were taken every 15 min. Movie shows a typical cell that delayed during mitosis with significant problems on chromosome congression. Cell finally exited mitosis and presented impaired chromosome segregation, resulting in visible chromosome bridges, fractionation of the nucleus, and the formation of a multinuclear cell.

[Movie S4](#)

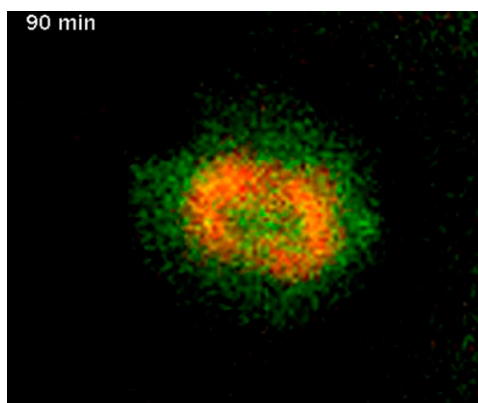

**Movie S5.** Greatwall siRNA-No Metaphase Plate. HeLa cells stably expressing H2B-Cherry FP (red) and EB3-GFP (green) were transfected with 50 nM of hGwl siRNA, then synchronized using thymidine. Movies were started 5 h after release and frames were taken every 15 min. Movie shows a typical cell that fails to form a metaphase plate. Cells pass directly from a prometaphase to an anaphase without chromosome congression. Premature anaphase occurs and the cell pinches through the mass of DNA forming multiple DNA bridges.

#### [Movie S5](#)

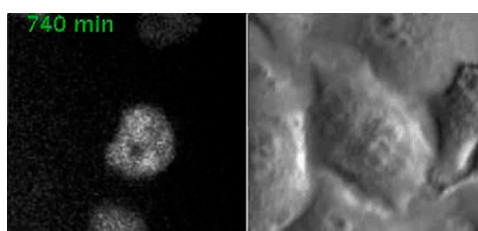

**Movie S6.** HeLa cells stably expressing H2B-Cherry FP and EB3-GFP were transfected with 100 nM of hGwl siRNA, synchronized by thymidine block, and 6 h after release followed by time-lapse microscopy. Frames were taken every 10 min. Indicated time corresponds to minutes after release. Movie shows a typical cell that had a long delay in G2 and 13 h 30 min after release condensed chromosomes but failed to form a metaphase plate.

#### [Movie S6](#)

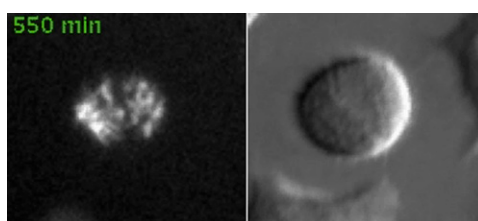

**Movie S7.** HeLa cells stably expressing H2B-cherry FP and EB3-GFP were transfected with 100 nM of hGwl siRNA and synchronized by thymidine block, and 6-h after release, cells were treated with 500 nM of okadaic acid and followed by time-lapse microscopy. Frames were taken every 10 min. Indicated time corresponds to minutes after release. Movie shows a typical Gwl depleted cell that enters mitosis with normal kinetics.

#### [Movie S7](#)
